# Supplementary material
Source: publisher figshare collection journal article supplement (https://asha.figshare.com/articles/dataset/_/17700992)
Supplement: Supplementary file 1 [file 1]

## Supplemental Material S2. The specific database search strategies for each database.

### 1. Medline

|                                                                                                                                                                                                                                                                                                                                                                                                                                                                                                                                                                                                                                                                                                                                                                                                                                                                                                                                                                                                                                                                                                                                          |                                                                                                                                                                                                                                                                                                                   |
|------------------------------------------------------------------------------------------------------------------------------------------------------------------------------------------------------------------------------------------------------------------------------------------------------------------------------------------------------------------------------------------------------------------------------------------------------------------------------------------------------------------------------------------------------------------------------------------------------------------------------------------------------------------------------------------------------------------------------------------------------------------------------------------------------------------------------------------------------------------------------------------------------------------------------------------------------------------------------------------------------------------------------------------------------------------------------------------------------------------------------------------|-------------------------------------------------------------------------------------------------------------------------------------------------------------------------------------------------------------------------------------------------------------------------------------------------------------------|
| <p>Interface: Ovid MEDLINE(R) and Epub Ahead of Print, In-Process &amp; Other Non-Indexed Citations and Daily</p> <p>Date of Search: 12 February 2020</p> <p>Number of hits: 2,601</p> <p>Comment: In Ovid, two or more words are automatically searched as phrases; i.e. no quotation marks are needed</p>                                                                                                                                                                                                                                                                                                                                                                                                                                                                                                                                                                                                                                                                                                                                                                                                                              | <p>Field labels</p> <ul style="list-style-type: none"> <li>• exp/ = exploded MeSH term</li> <li>• / = non exploded MeSH term</li> <li>• .ti,ab,kf. = title, abstract and author keywords</li> <li>• adjx = within x words, regardless of order</li> <li>• * = truncation of word for alternate endings</li> </ul> |
| <ol style="list-style-type: none"> <li>1. exp Cleft Palate/</li> <li>2. exp Cleft Lip/</li> <li>3. exp Velopharyngeal Insufficiency/</li> <li>4. (harelip* or hare lip* or labiopalatoschi* or palatoschi* or palatischi* or palatolabioschi* or palatum fissum).ti,ab,kf.</li> <li>5. ((palatopharyngeal or velopharyngeal) adj3 (incompetenc* or insufficienc*)).ti,ab,kf.</li> <li>6. cleft*.ti,ab,kf.</li> <li>7. 1 or 2 or 3 or 4 or 5 or 6</li> <li>8. exp "Rehabilitation of Speech and Language Disorders"/</li> <li>9. exp "Early Intervention (Education)"/</li> <li>10. exp Speech Production Measurement/</li> <li>11. (articulat* or language* or misarticulat* or phonolog* or speech* or voice*).ti,ab,kf.</li> <li>12. (therap* or training or treat* or rehabilitat* or intervention*).ti,ab,kf.</li> <li>13. 11 and 12</li> <li>14. (early adj3 (educat* or intervention*)).ti,ab,kf.</li> <li>15. (Speech adj3 (assess* or screen* or measure* or outcome* or evaluat* or test*)).ti,ab,kf.</li> <li>16. 8 or 9 or 10 or 13 or 14 or 15</li> <li>17. 7 and 16</li> <li>18. 17 not (animals not humans).sh.</li> </ol> |                                                                                                                                                                                                                                                                                                                   |

## 2. Embase

|                                                                                                                                                                 |                                                                                                                                                                                                                                                                                                     |
|-----------------------------------------------------------------------------------------------------------------------------------------------------------------|-----------------------------------------------------------------------------------------------------------------------------------------------------------------------------------------------------------------------------------------------------------------------------------------------------|
| <p>Interface: embase.com</p> <p>Date of Search: 12 February 2020</p> <p>Number of hits: 3,359</p> <p>Comment: Emtree is the controlled vocabulary in Embase</p> | <p>Field labels</p> <ul style="list-style-type: none"> <li>• /exp = exploded Emtree term</li> <li>• /de = non exploded Emtree term</li> <li>• ti,ab = title and abstract</li> <li>• NEAR/x = within x words, regardless of order</li> <li>• * = truncation of word for alternate endings</li> </ul> |
|-----------------------------------------------------------------------------------------------------------------------------------------------------------------|-----------------------------------------------------------------------------------------------------------------------------------------------------------------------------------------------------------------------------------------------------------------------------------------------------|

  

#18 NOT ([animals]/lim NOT [humans]/lim)

#18 #8 AND #17

#17 #9 OR #10 OR #11 OR #14 OR #15 OR #16

#16 (speech NEAR/3 (assess\* OR screen\* OR measure\* OR outcome\* OR evaluat\* OR test\*)):ti,ab,kw

#15 (early NEAR/3 (educat\* OR intervention\*)):ti,ab,kw

#14 #12 AND #13

#13 therap\*:ti,ab,kw OR training:ti,ab,kw OR treat\*:ti,ab,kw OR rehabilitat\*:ti,ab,kw OR intervention\*:ti,ab,kw

#12 articul\*:ti,ab,kw OR language\*:ti,ab,kw OR misarticulat\*:ti,ab,kw OR phonolog\*:ti,ab,kw OR speech\*:ti,ab,kw OR voice\*:ti,ab,kw

#11 'speech analysis'/exp

#10 'early childhood intervention'/de

#9 'speech rehabilitation'/exp

#8 #1 OR #2 OR #3 OR #4 OR #5 OR #6 OR #7

#7 cleft\*:ti,ab,kw

#6 ((palatopharyngeal OR velopharyngeal) NEAR/3 (incompetenc\* OR insufficienc\*)):ti,ab,kw

#5 harelip\*:ti,ab,kw OR 'hare lip':ti,ab,kw OR labiopalatoschi\*:ti,ab,kw OR palatoschi\*:ti,ab,kw OR palatischi\*:ti,ab,kw OR palatolabioschi\*:ti,ab,kw OR 'palatum fissum':ti,ab,kw

#4 'cleft lip face palate'/exp

#3 'cleft lip with or without cleft palate'/exp

#2 'palatopharyngeal incompetence'/exp

#1 'cleft palate'/exp

### 3. Cochrane Library

|                                                                                                                                                                                                                                                                                                                                                                                                                                                                                                                                                                                                                                                                                                                  |                                                                                                                                                                                                                    |
|------------------------------------------------------------------------------------------------------------------------------------------------------------------------------------------------------------------------------------------------------------------------------------------------------------------------------------------------------------------------------------------------------------------------------------------------------------------------------------------------------------------------------------------------------------------------------------------------------------------------------------------------------------------------------------------------------------------|--------------------------------------------------------------------------------------------------------------------------------------------------------------------------------------------------------------------|
| Interface: Wiley                                                                                                                                                                                                                                                                                                                                                                                                                                                                                                                                                                                                                                                                                                 | Field labels                                                                                                                                                                                                       |
| Date of Search: 12 February 2020                                                                                                                                                                                                                                                                                                                                                                                                                                                                                                                                                                                                                                                                                 | <ul style="list-style-type: none"> <li>• ti,ab,kw = title, abstract and author keywords</li> <li>• NEAR/x = within x words, regardless of order</li> <li>• * = truncation of word for alternate endings</li> </ul> |
| Number of hits: 173 (17 +156)                                                                                                                                                                                                                                                                                                                                                                                                                                                                                                                                                                                                                                                                                    |                                                                                                                                                                                                                    |
| <p>#1 (harelip* or (hare NEXT lip*) or labiopalatoschi* or palatoschi* or palatischi* or palatolabioschi* or "palatum fissum"):ti,ab,kw</p> <p>#2 ((palatopharyngeal or velopharyngeal) NEAR/3 (incompetenc* or insufficienc*)):ti,ab,kw</p> <p>#3 cleft*:ti,ab,kw</p> <p>#4 #1 OR #2 OR #3</p> <p>#5 (articulat* or language* or misarticulat* or phonolog* or speech* or voice*):ti,ab,kw</p> <p>#6 (therap* or training or treat* or rehabilitat* or intervention*):ti,ab,kw</p> <p>#7 #5 AND #6</p> <p>#8 (early NEAR/3 (educat* or intervention*)):ti,ab,kw</p> <p>#9 (speech NEAR/3 (assess* or screen* or measure* or outcome* or evaluat* or test*))</p> <p>#10 #7 OR #8 OR #9</p> <p>#11 #4 AND #10</p> |                                                                                                                                                                                                                    |

## 4. Web of Science Core Collection

|                                                                                                                                                                                                                                                                                                                                                                                                                                                                                                                                                                                                                                                                                             |                                                                                                                                                                                                                                                                                                                                                                                    |
|---------------------------------------------------------------------------------------------------------------------------------------------------------------------------------------------------------------------------------------------------------------------------------------------------------------------------------------------------------------------------------------------------------------------------------------------------------------------------------------------------------------------------------------------------------------------------------------------------------------------------------------------------------------------------------------------|------------------------------------------------------------------------------------------------------------------------------------------------------------------------------------------------------------------------------------------------------------------------------------------------------------------------------------------------------------------------------------|
| <p>Interface: Clarivate Analytics</p> <p>Date of Search: 12 February 2020</p> <p>Number of hits: 1,711</p>                                                                                                                                                                                                                                                                                                                                                                                                                                                                                                                                                                                  | <p>Field labels</p> <ul style="list-style-type: none"> <li>• TS/Topic = title, abstract, author keywords and Keywords Plus</li> <li>• NEAR/x = within x words, regardless of order</li> <li>• * = truncation of word for alternate endings</li> </ul> <p>Note: sometimes "quotation marks" are needed for single search terms to avoid automatic term mapping (lemmatization).</p> |
| <p>#1 <b>TOPIC:</b> ((harelip* or "hare lip*" or labiopalatoschi* or palatoschi* or palatischi* or palatolabioschi* or "palatum fissum")) OR <b>TOPIC:</b> (((palatopharyngeal or velopharyngeal) NEAR/2 (incompetenc* or insufficienc*))) OR <b>TOPIC:</b> (cleft*)</p> <p>#2 <b>TOPIC:</b> ((articulat* or language* or misarticulat* or phonolog* or speech* or voice*))</p> <p>AND <b>TOPIC:</b> ((therap* or training or treat* or rehabilitat* or intervention*))</p> <p>#3 <b>TOPIC:</b> ((early NEAR/2 (educat* or intervention*))) OR <b>TOPIC:</b> ((speech NEAR/2 (assess* or screen* or measure* or outcome* or evaluat* or test*)))</p> <p>#4 #3 OR #2</p> <p>#5 #4 AND #1</p> |                                                                                                                                                                                                                                                                                                                                                                                    |

## 5. Psycinfo

|                                                                                                                                                                                                                                                                                                                                                                                                                                                                                                                                                                                                                                                                                                                                                                                                                                    |                                                                                                                                                                                                                                                                                                                               |
|------------------------------------------------------------------------------------------------------------------------------------------------------------------------------------------------------------------------------------------------------------------------------------------------------------------------------------------------------------------------------------------------------------------------------------------------------------------------------------------------------------------------------------------------------------------------------------------------------------------------------------------------------------------------------------------------------------------------------------------------------------------------------------------------------------------------------------|-------------------------------------------------------------------------------------------------------------------------------------------------------------------------------------------------------------------------------------------------------------------------------------------------------------------------------|
| <p>Interface: Ovid</p> <p>Date of Search: 12 February 2020</p> <p>Number of hits: 267</p> <p>Comment: In Ovid, two or more words are automatically searched as phrases; i.e. no quotation marks are needed</p>                                                                                                                                                                                                                                                                                                                                                                                                                                                                                                                                                                                                                     | <p>Field labels</p> <ul style="list-style-type: none"> <li>• exp/ = exploded controlled term</li> <li>• / = non exploded controlled term</li> <li>• .ti,ab,id. = title, abstract and author keywords</li> <li>• adjx = within x words, regardless of order</li> <li>• * = truncation of word for alternate endings</li> </ul> |
| <p>1. exp Cleft Palate/<br/> 2. (harelip* or hare lip* or labiopalatoschi* or palatoschi* or palatisci* or palatolabioschi* or palatum fissum).ti,ab,id.<br/> 3. ((palatopharyngeal or velopharyngeal) adj3 (incompetenc* or insufficienc*)).ti,ab,id.<br/> 4. cleft*.ti,ab,id.<br/> 5. 1 or 2 or 3 or 4<br/> <br/> 6. Speech Therapy/<br/> 7. Language Therapy/<br/> 8. Early Intervention/<br/> 9. (articulat* or language* or misarticulat* or phonolog* or speech* or voice*).ti,ab,id.<br/> 10. (therap* or training or treat* or rehabilitat* or intervention*).ti,ab,id.<br/> 11. 9 and 10<br/> 12. (early adj3 (educat* or intervention*)).ti,ab,id.<br/> 13. (Speech adj3 (assess* or screen* or measure* or outcome* or evaluat* or test*)).ti,ab,id.<br/> <br/> 14. 6 or 7 or 8 or 11 or 12 or 13<br/> 15. 5 and 14</p> |                                                                                                                                                                                                                                                                                                                               |

## 6. Cinahl

| Interface: Ebsco                 |                                                                                                                                                                                                                                                          | Field labels                                                                                                                                                                                                                                                                      |
|----------------------------------|----------------------------------------------------------------------------------------------------------------------------------------------------------------------------------------------------------------------------------------------------------|-----------------------------------------------------------------------------------------------------------------------------------------------------------------------------------------------------------------------------------------------------------------------------------|
| Date of Search: 12 February 2020 |                                                                                                                                                                                                                                                          | <ul style="list-style-type: none"><li>• MH+ = exploded Cinahl Heading</li><li>• MH = non exploded Cinahl Heading</li><li>• TI = title</li><li>• AB = abstract</li><li>• Nx = within x words, regardless of order</li><li>• * = truncation of word for alternate endings</li></ul> |
| Number of hits: 646              |                                                                                                                                                                                                                                                          |                                                                                                                                                                                                                                                                                   |
| S17                              | S7 AND S16                                                                                                                                                                                                                                               |                                                                                                                                                                                                                                                                                   |
| S16                              | S8 OR S9 OR S10 OR S13 OR S14 OR S15                                                                                                                                                                                                                     |                                                                                                                                                                                                                                                                                   |
| S15                              | TI ( (speech N2 (assess* or screen* or measure* or outcome* or evaluat* or test*)) ) OR AB ( (speech N2 (assess* or screen* or measure* or outcome* or evaluat* or test*)) )                                                                             |                                                                                                                                                                                                                                                                                   |
| S14                              | TI ( (early N2 (educat* or intervention*)) ) OR AB ( (early N2 (educat* or intervention*)) )                                                                                                                                                             |                                                                                                                                                                                                                                                                                   |
| S13                              | S11 AND S12                                                                                                                                                                                                                                              |                                                                                                                                                                                                                                                                                   |
| S12                              | TI ( (therap* or training or treat* or rehabilitat* or intervention*) ) OR AB ( (therap* or training or treat* or rehabilitat* or intervention*) )                                                                                                       |                                                                                                                                                                                                                                                                                   |
| S11                              | TI ( (articulat* or language* or misarticulat* or phonolog* or speech* or voice*) ) OR AB ( (articulat* or language* or misarticulat* or phonolog* or speech* or voice*) )                                                                               |                                                                                                                                                                                                                                                                                   |
| S10                              | (MH "Speech Production Measurement+")                                                                                                                                                                                                                    |                                                                                                                                                                                                                                                                                   |
| S9                               | (MH "Early Intervention+")                                                                                                                                                                                                                               |                                                                                                                                                                                                                                                                                   |
| S8                               | (MH "Rehabilitation, Speech and Language+")                                                                                                                                                                                                              |                                                                                                                                                                                                                                                                                   |
| S7                               | S1 OR S2 OR S3 OR S4 OR S5 OR S6                                                                                                                                                                                                                         |                                                                                                                                                                                                                                                                                   |
| S6                               | TI cleft* OR AB cleft*                                                                                                                                                                                                                                   |                                                                                                                                                                                                                                                                                   |
| S5                               | TI ( ((palatopharyngeal or velopharyngeal) N2 (incompetenc* or insufficienc*)) ) OR AB ( ((palatopharyngeal or velopharyngeal) N2 (incompetenc* or insufficienc*)) )                                                                                     |                                                                                                                                                                                                                                                                                   |
| S4                               | TI ( (harelip* or "hare lip*" or labiopalatoschi* or palatoschi* or palatischi* or palatolabioschi* or "palatum fissum") ) OR AB ( (harelip* or "hare lip*" or labiopalatoschi* or palatoschi* or palatischi* or palatolabioschi* or "palatum fissum") ) |                                                                                                                                                                                                                                                                                   |
| S3                               | (MH "Velopharyngeal Insufficiency")                                                                                                                                                                                                                      |                                                                                                                                                                                                                                                                                   |
| S2                               | (MH "Cleft Lip")                                                                                                                                                                                                                                         |                                                                                                                                                                                                                                                                                   |
| S1                               | (MH "Cleft Palate")                                                                                                                                                                                                                                      |                                                                                                                                                                                                                                                                                   |
